# Supplementary material
Source: PubMed Central journal article supplement (PMC545515)

# Saline METH

I

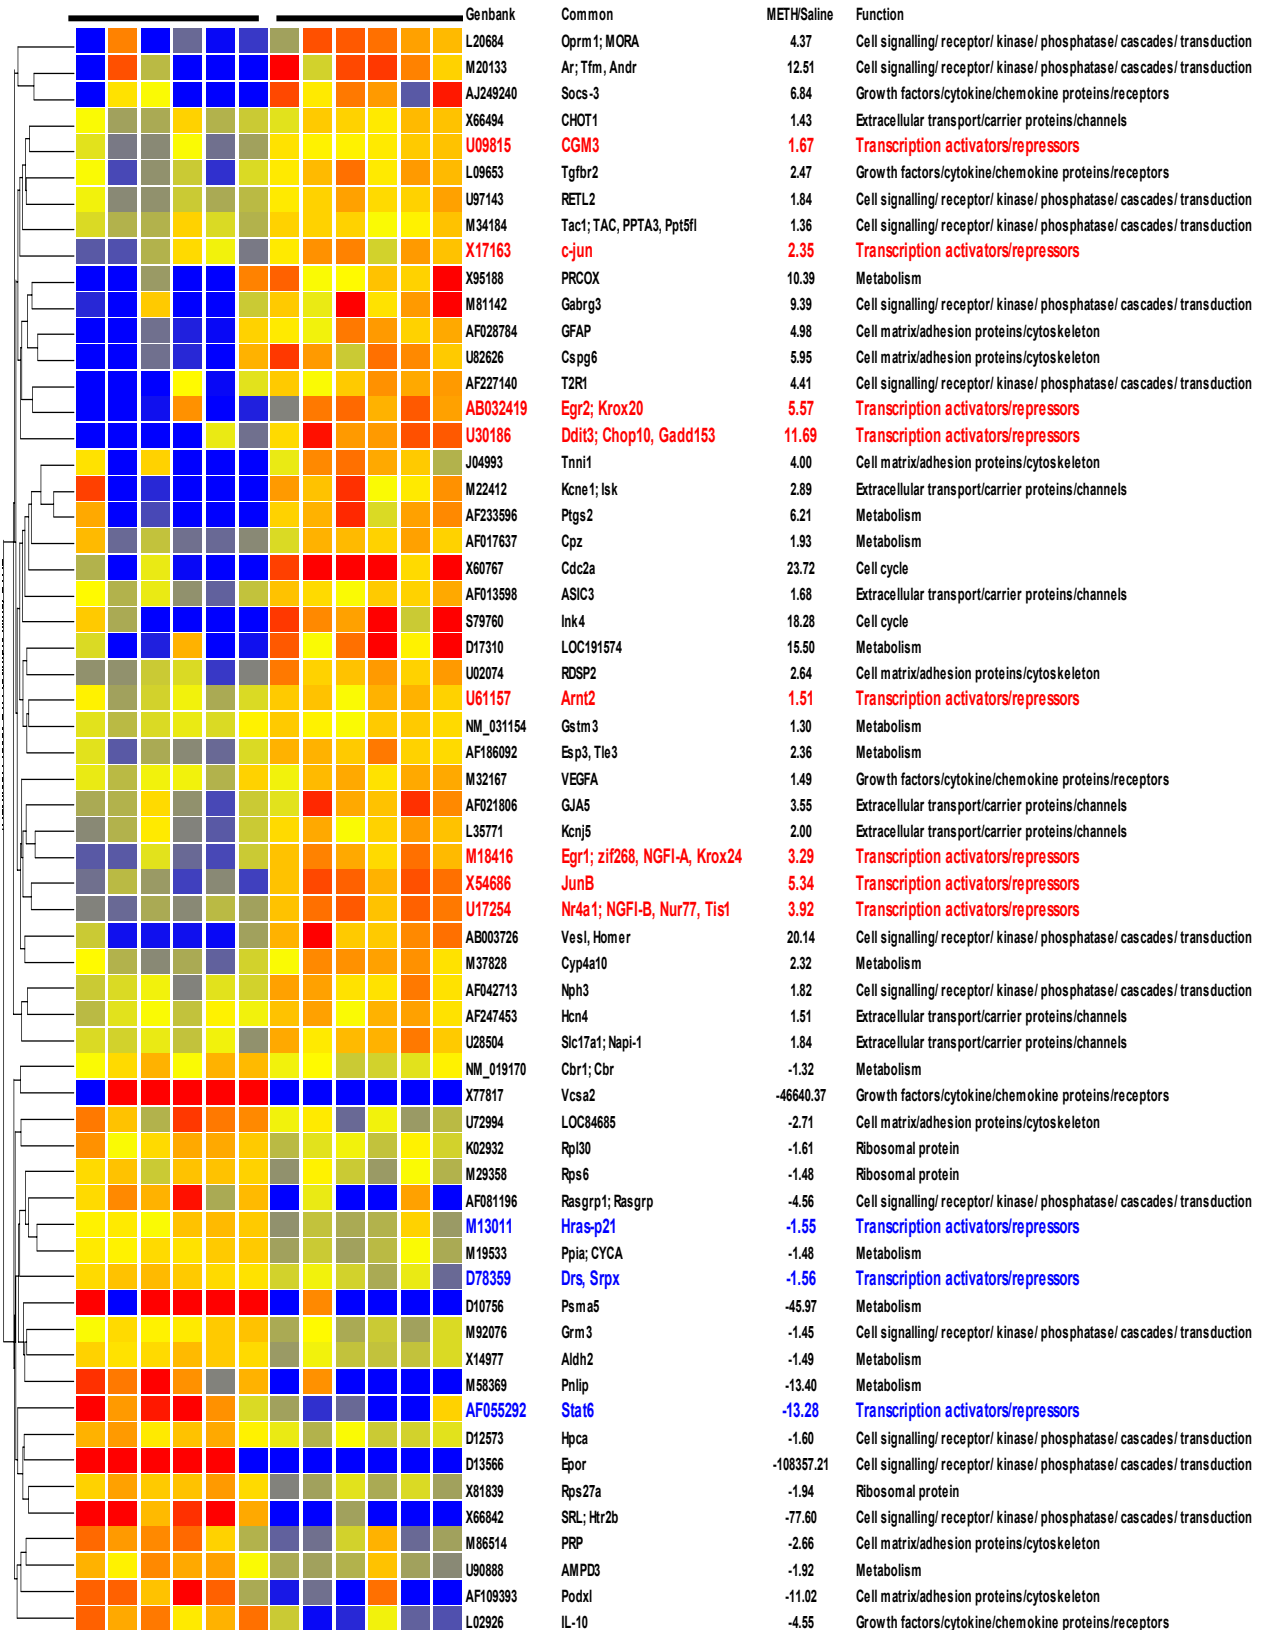

Expression

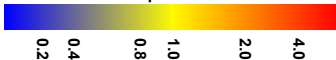

II

Supplement: pnas_102_3_868__2.pdf [file pnas_102_3_868__2.pdf]

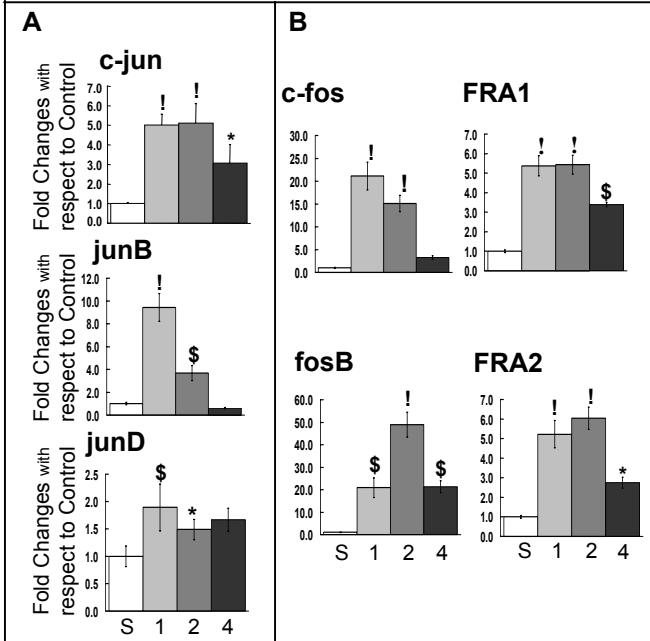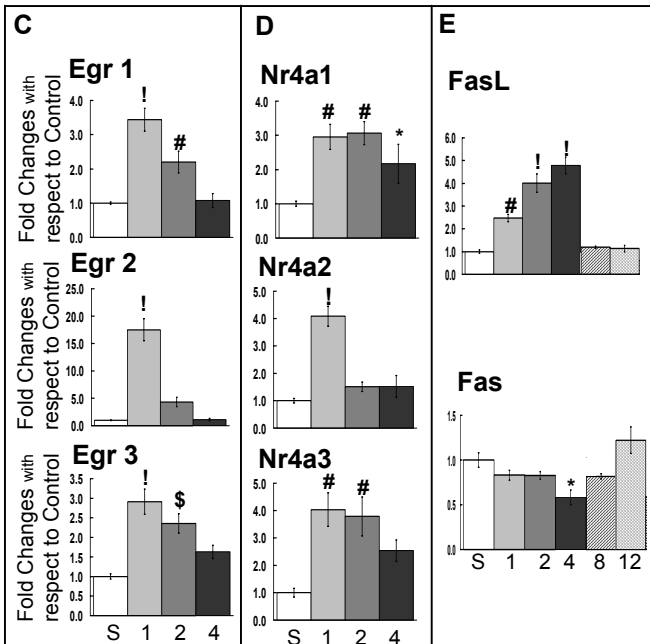

Supplement: pnas_102_3_868__3.pdf [file pnas_102_3_868__3.pdf]

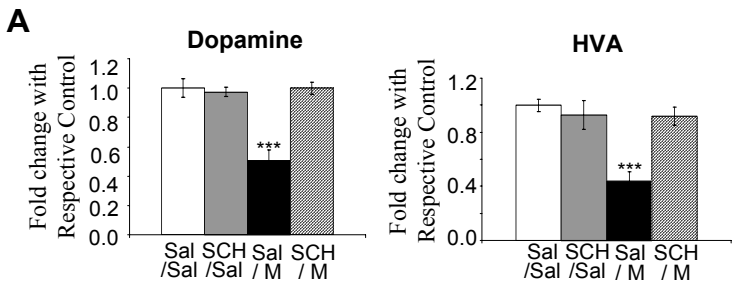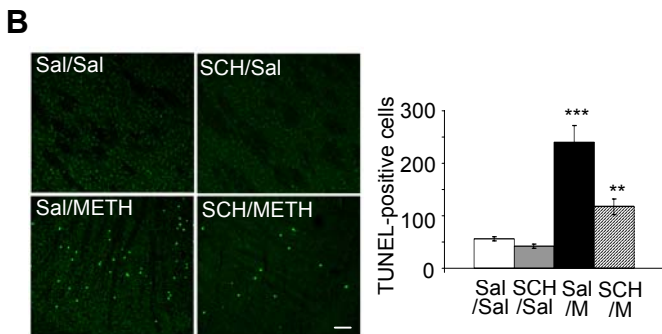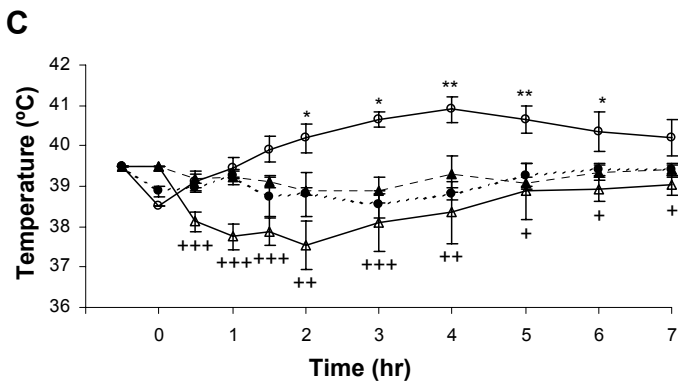

Supplement: pnas_102_3_868__4.pdf [file pnas_102_3_868__4.pdf]
